# Supplementary material for: Brief communication: The curious case of the large wood-laden flow event in the Pocuro stream (Chile)
Source: Copernicus journal article supplement (doi:10.5194/nhess-17-2053-2017), 2017-11-28
Supplement: Supplementary file [file nhess-17-2053-2017-supplement-title-page.pdf › nhess-17-2053-2017-supplement-title-page.pdf]

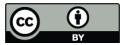

## *Supplement of*

# **Brief communication: The curious case of the large wood-laden flow event in the Pocuro stream (Chile)**

**Diego Ravazzolo et al.**

*Correspondence to:* Luca Mao (lmao@uc.cl)

- nhess-17-2053-2017-supplement-title-page.pdf
- Estero\_Pocuro\_Chile\_25\_February\_2017
  - Estero\_Pocuro\_Chile\_25\_February\_2017.mp4

The copyright of individual parts of the supplement might differ from the CC BY 3.0 License.
